# Supplementary material for: Synthesis of Copper Nanoparticles from Cu2+-Spiked Wastewater via Adsorptive Separation and Subsequent Chemical Reduction
Source: MDPI journal article supplement (doi:10.3390/nano11082051), 2021-08-12
Supplement: s1 [file s1]

Supplementary information

# Synthesis of Copper Nanoparticles from Cu<sup>2+</sup>-Spiked Wastewater via Adsorptive Separation and Subsequent Chemical Reduction

Hye-Jin Hong <sup>1</sup> and Jungho Ryu <sup>2,\*</sup>

<sup>1</sup> Department of Environmental Engineering, Chungbuk National University,  
Chungdae-ro 1, Seowon-Gu, Cheongju, Chungbuk 28644, Korea;  
hyejiny@chungbuk.ac.kr

<sup>2</sup> Geologic Environment Research Division, Korea Institute of Geoscience and  
Mineral Resources (KIGAM), Daejeon 34132, Korea

\* Correspondence: jryu@kigam.re.kr, +82-42-868-3943

### [Adsorption Kinetic Models]

Pseudo-second order adsorption kinetic model is described as follows:

$$\frac{t}{q_t} = \frac{1}{k_2 q_e^2} + \frac{1}{q_e} t, \quad (1)$$

where  $Q_t$  and  $Q_e$  (mg/cm<sup>3</sup>) is adsorbed Cu<sup>2+</sup> on PEI-CNF aerogels at time  $t$  (h) and equilibrium, respectively.  $k_2$  represents pseudo-second order adsorption kinetic constants.  $h$  is the value reflects the initial adsorption rate on the adsorbent.

Intra-particle diffusion model equation can be expressed:

$$q_t = k_p t^{0.5} + X_i \quad (2)$$

where  $k_p$  represents reaction rate constant and  $X_i$  is related to thickness of the boundary layer.

**Table S1.** Cu<sup>2+</sup> adsorption kinetic model parameters on PEI@CNF aerogel in batch and column operation mode

|                                   | Pseudo-second order model |        |        | Intraparticle diffusion model |        |        |
|-----------------------------------|---------------------------|--------|--------|-------------------------------|--------|--------|
|                                   | $q_e$                     | $k_2$  | $R^2$  | $X_i$                         | $k_p$  | $R^2$  |
| <b>Batch adsorption test</b>      | 3.94                      | 0.204  | 0.9996 | 1.519                         | 0.431  | 0.7334 |
| <b>Continuous adsorption test</b> | 0.0748                    | 0.4919 | 0.9225 | 0.004                         | 0.0073 | 0.9933 |
